# Supplementary material for: Anisotropic shock sensitivity in a single crystal δ-cyclotetramethylene tetranitramine: a reactive molecular dynamics study
Source: Royal Society of Chemistry journal article supplement (doi:10.1039/c4cp05575f), 2015-01-01
Supplement: c4cp05575f1.pdf [file c4cp05575f1.pdf]

Electronic Supplementary Information (ESI)

# Anisotropic Shock Sensitivity in Single Crystal $\delta$ -Cyclotetramethylene Tetranitramine: A Reactive Molecular Dynamics Study

(Ting-Ting Zhou, Jian-Feng Lou, Hua-Jie Song, Feng-Lei Huang)

**Table S1** The averaged full stress tensors for the seven compressed systems after NVT-MD relaxation (unit:

GPa)

| Shock plane | $P$    | $P_{xx}$ | $P_{yy}$ | $P_{zz}$ | $P_{xy}$ | $P_{xz}$ | $P_{yz}$ |
|-------------|--------|----------|----------|----------|----------|----------|----------|
| (110)       | 10.133 | 11.364   | 9.812    | 9.223    | -0.069   | -0.116   | -0.008   |
| (011)       | 9.550  | 9.380    | 9.740    | 9.531    | 0.605    | -0.251   | 0.055    |
| (010)       | 9.678  | 8.752    | 10.447   | 9.834    | 0.828    | -0.006   | 0.004    |
| (100)       | 9.619  | 10.681   | 8.918    | 9.258    | -0.230   | 0.131    | -0.074   |
| (001)       | 8.954  | 8.041    | 8.052    | 10.769   | -0.033   | 0.082    | -0.065   |
| (101)       | 9.673  | 10.789   | 8.884    | 9.347    | 0.521    | -0.150   | -0.401   |
| (111)       | 9.778  | 10.612   | 9.987    | 8.735    | -0.514   | 0.081    | -0.228   |

**Table S2.** Bond order cutoff values for various atom pairs. The algorithm of molecule recognition in the fragment analysis uses these values.

|   | C    | H    | O    | N    |
|---|------|------|------|------|
| C | 0.55 | 0.40 | 0.60 | 0.30 |
| H |      | 0.55 | 0.40 | 0.55 |
| O |      |      | 0.65 | 0.40 |
| N |      |      |      | 0.55 |

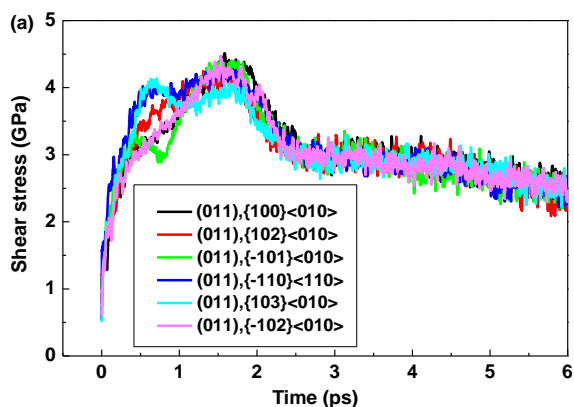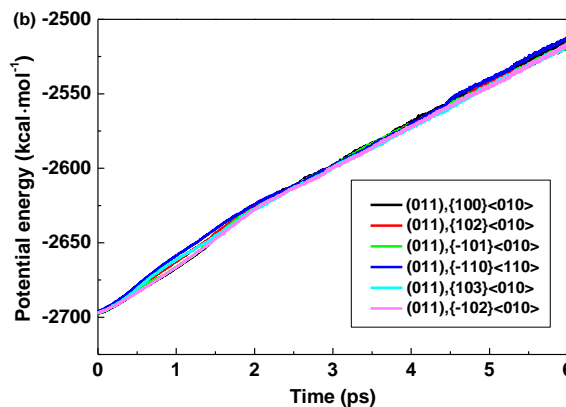

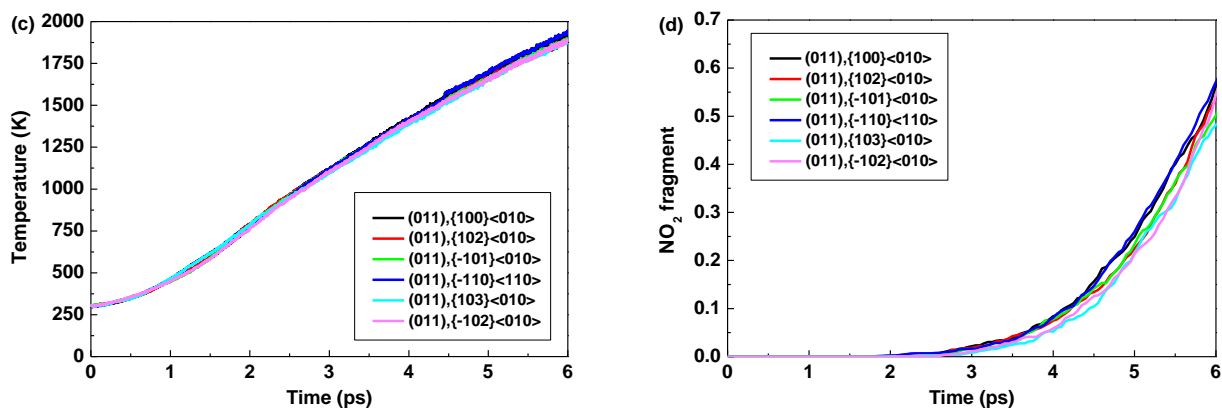

**Fig. S1** Time evolutions of shear stress, potential energy per HMX molecule, temperature, and NO<sub>2</sub> product per HMX molecule for the four possible slip systems along shock direction normal to the (011) plane during shear simulations

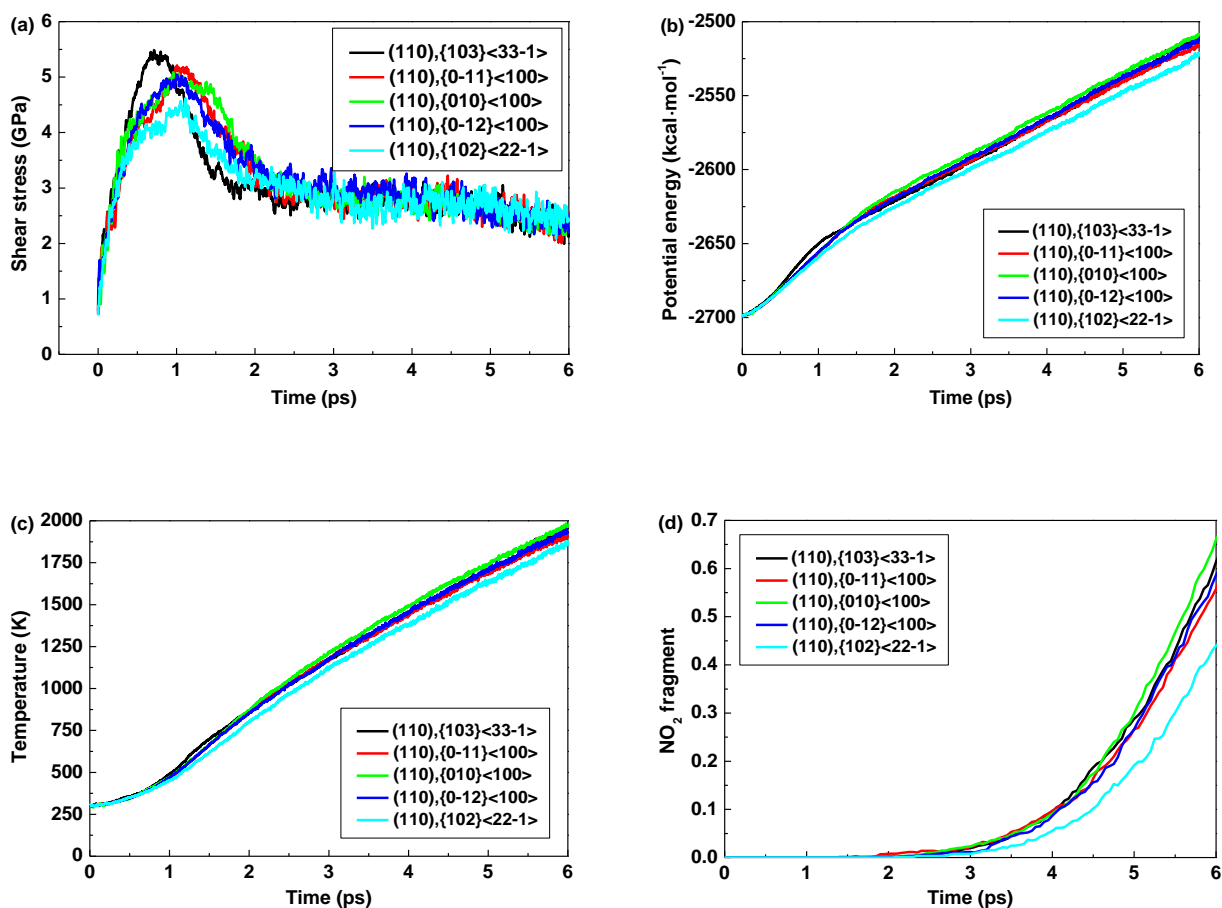

**Fig. S2** Time evolutions of shear stress, potential energy per HMX molecule, temperature, and NO<sub>2</sub> product per HMX molecule for the four possible slip systems along shock direction normal to the (110) plane during shear simulations

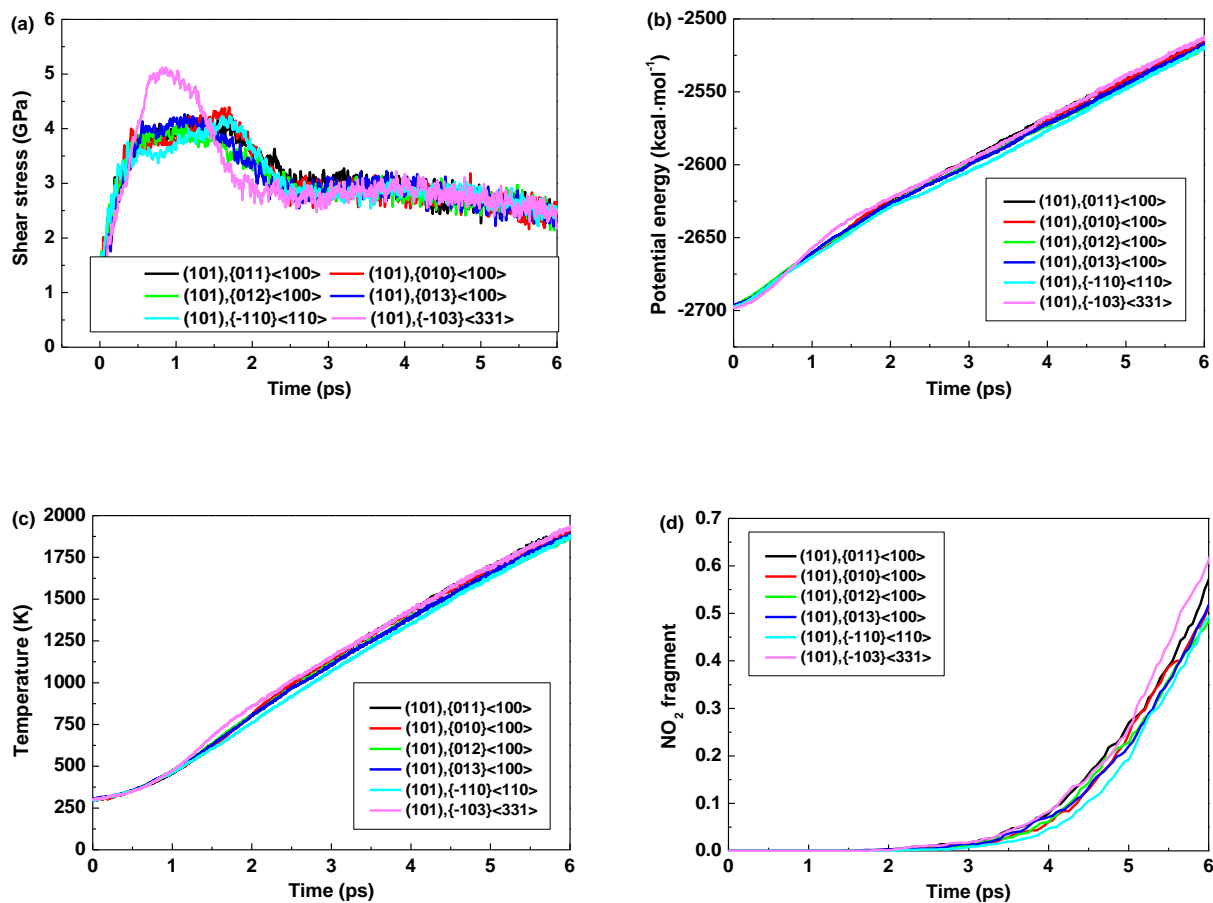

**Fig. S3** Time evolutions of shear stress, potential energy per HMX molecule, temperature, and  $\text{NO}_2$  product per HMX molecule for the four possible slip systems along shock direction normal to the (101) plane during shear simulations

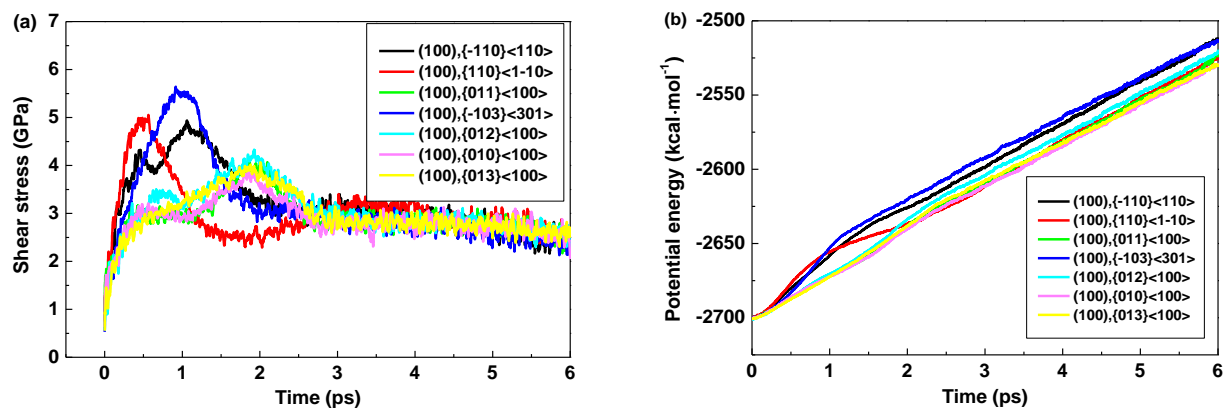

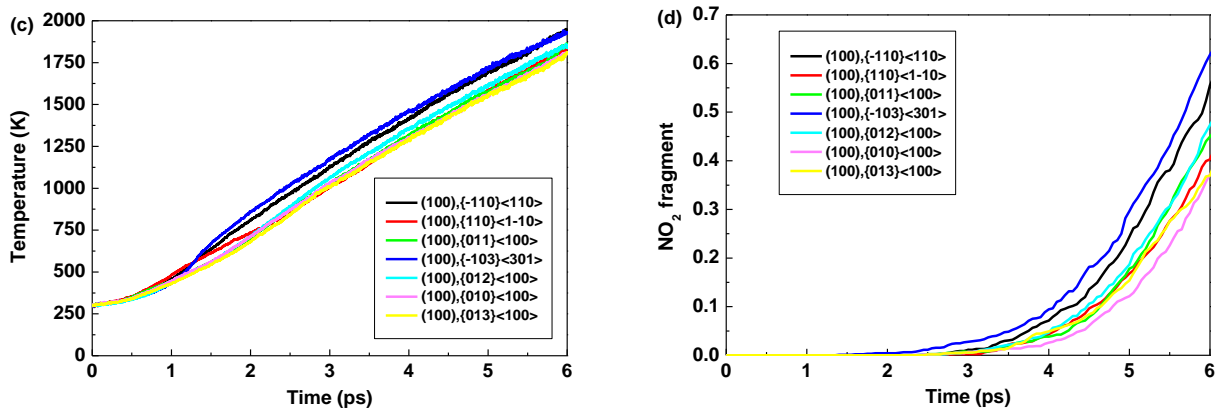

**Fig. S4** Time evolutions of shear stress, potential energy per HMX molecule, temperature, and NO<sub>2</sub> product per HMX molecule for the four possible slip systems along shock direction normal to the (100) plane during shear simulations

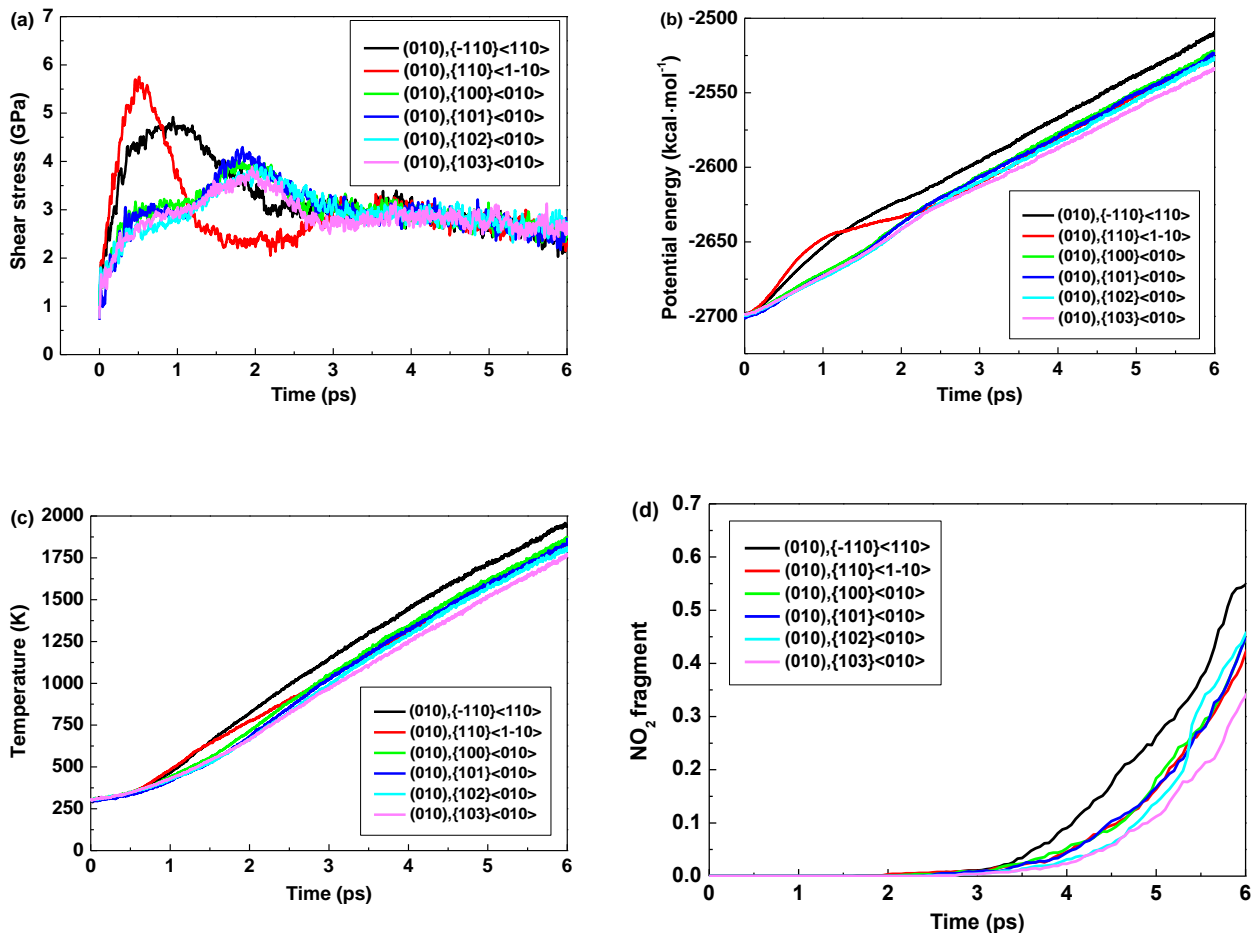

**Fig. S5** Time evolutions of shear stress, potential energy per HMX molecule, temperature, and NO<sub>2</sub> product per HMX molecule for the four possible slip systems along shock direction normal to the (010) plane during shear simulations

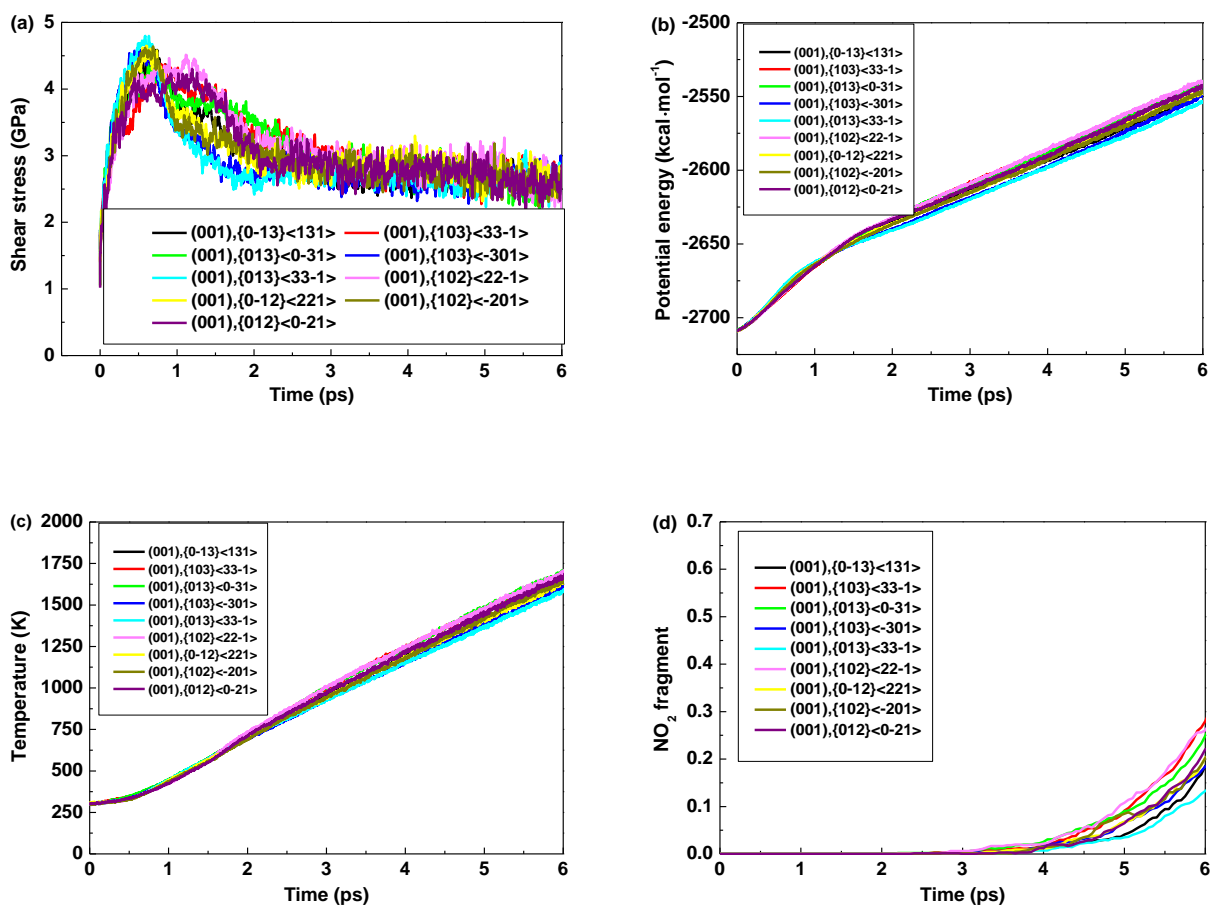

**Fig. S6** Time evolutions of shear stress, potential energy per HMX molecule, temperature, and NO<sub>2</sub> product per HMX molecule for the four possible slip systems along shock direction normal to the (001) plane during shear simulations

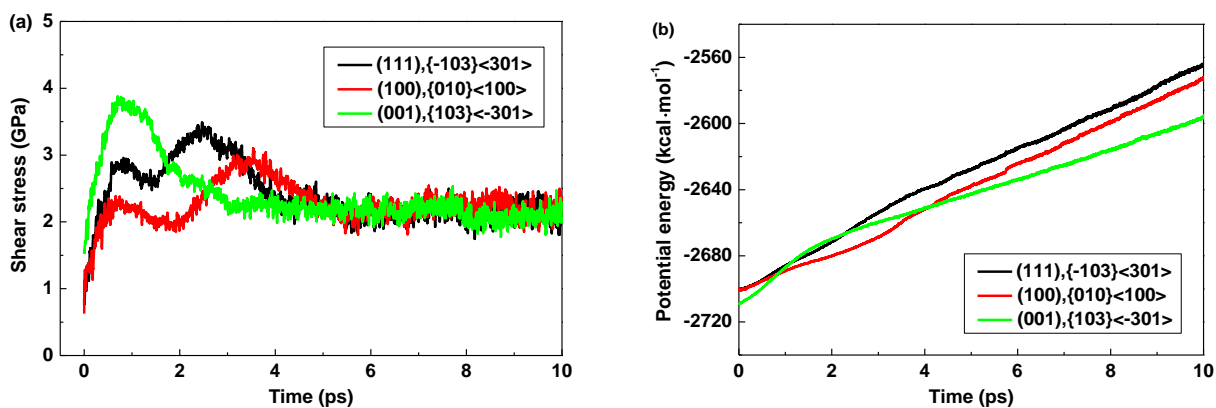

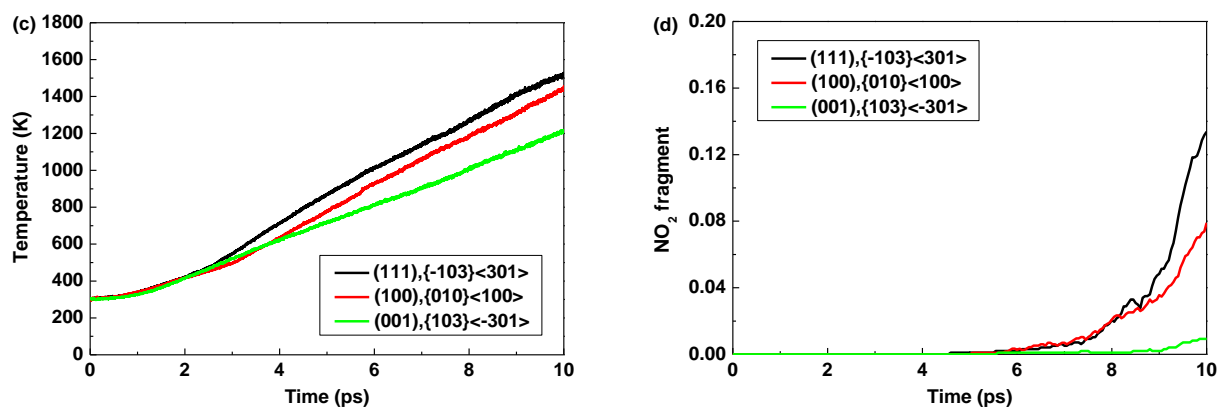

**Fig. S7** Time evolutions of shear stress, potential energy per HMX molecule, temperature, and NO<sub>2</sub> product per HMX molecule for the (111), (100), and (001) shock planes during shear simulations at shear rate 0.25 ps<sup>-1</sup>
